# Supplementary material for: Systematic Evaluation of Light-Activatable Biohybrids for Anti-Glioma Photodynamic Therapy
Source: PubMed Central journal article supplement (PMC6780262; doi:10.3390/jcm8091269), 2019-08-21
Supplement: jcm-08-01269-s001.pdf [file jcm-08-01269-s001.pdf]

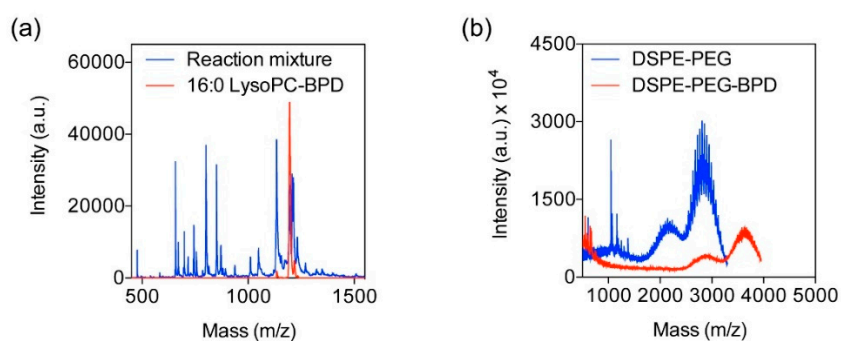

**Figure S1.** MALDI-TOF mass spectrometer analysis of 16:0 Lyso PC-BPD and DSPE-PEG-BPD. (a) Purified 16:0 Lyso PC-BPD showed a single primary product with mass of 1196.4 (red line), compared to the multiple products for the crude reaction mixture (blue line) (yield:  $20.1\% \pm 3.8\%$ ). (b) Purified DSPE-PEG-BPD demonstrated a shift peak mass at 3602.1 (red line) compared to the crude reaction mixture (blue line) (yield:  $13.0\% \pm 3.7\%$ ).

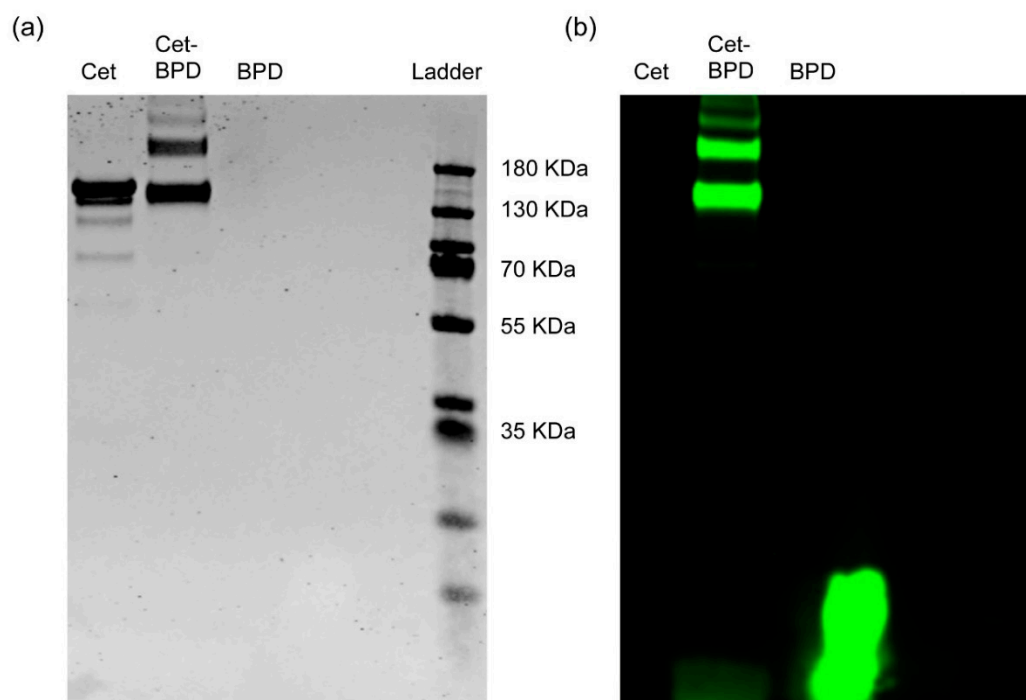

**Figure S2.** The purity of Cet-BPD was examined by monitoring free BPD molecules with gel fluorescence imaging analysis following sodium dodecyl sulfate polyacrylamide gel electrophoresis (SDS-PAGE). (a) Coomassie blue staining of SDS-PAGE for visualization of the standards, Cet, Cet-BPD, and free BPD. Conjugation of BPD on Cet led to the aggregation of Cet-BPD after linearization with SDS due to hydrophobicity of BPD. (b) Gel fluorescence imaging ( $E_m$ : 690 nm) of SDS-PAGE shows  $<1\%$  free BPD impurity in Cet-BPD; fluorescence intensity was quantified using ImageJ.

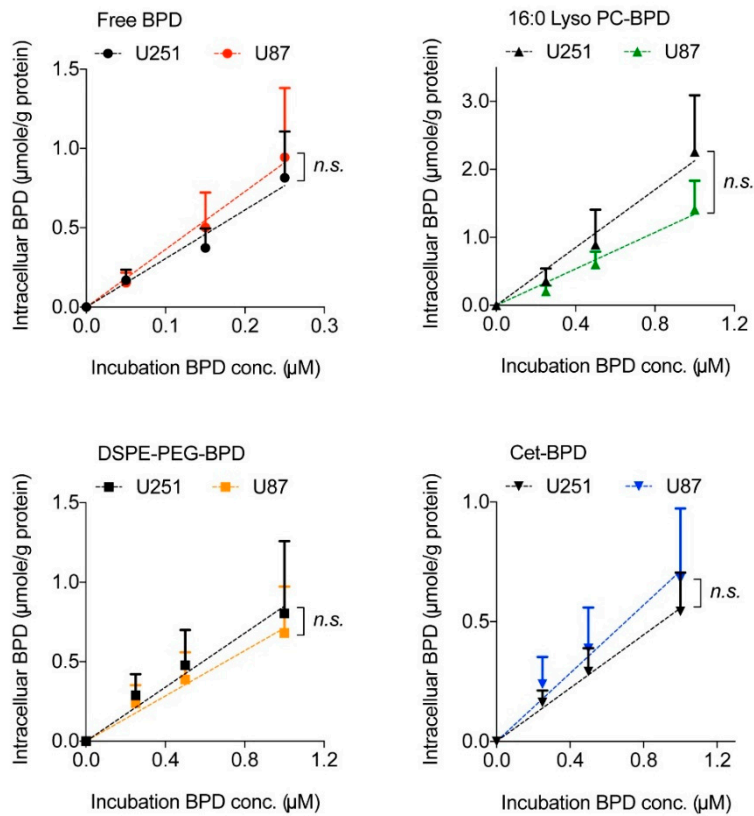

**Figure S3.** Comparison of PSBMs and free BPD uptake in human glioblastoma cell lines. Quantification of (a) free BPD, (b) 16:0 Lyso PC-BPD, (c) DSPE-PEG-BPD, and (d) Cet-BPD intracellular BPD concentrations at 24 h post-incubation, in U251 and U87 cells, using extraction method. ( $n = 5$ , *n.s.*: nonsignificant).

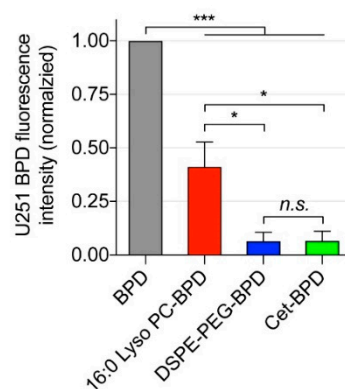

**Figure S4.** Quantification of BPD fluorescence signal in microscopy images of glioblastoma cells at 24 h post-incubation with free BPD, 16:0 Lyso PC-BPD, DESP-PEG-BPD, and Cet-BPD (0.25 μM). Quantification of fluorescence signal as determined by ImageJ software [33] ( $n = 4$ , \*  $p < 0.05$ , \*\*\*  $p < 0.001$ , *n.s.*: nonsignificant, one-way ANOVA with Tukey's post hoc test).

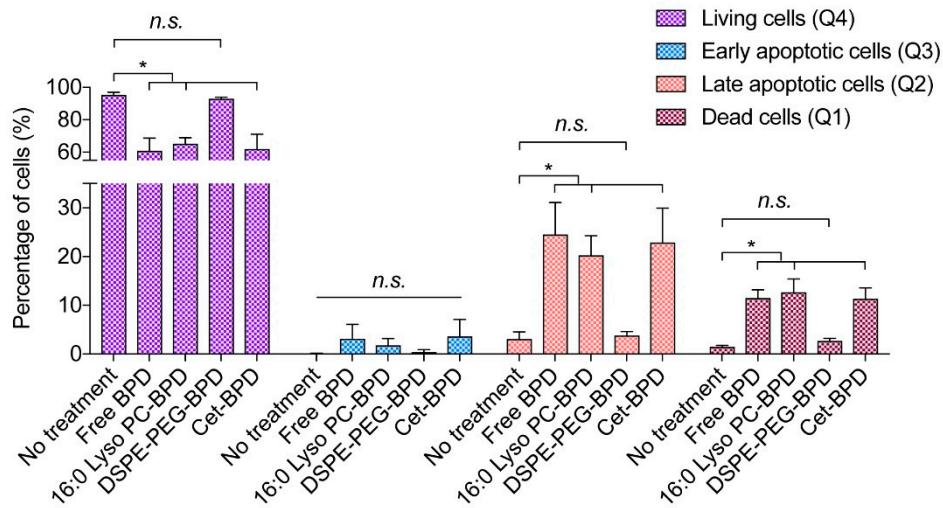

**Figure S5.** Apoptosis and necrosis quantification. Analysis showing the mean values of cell subpopulations (Q1: Annexin V-/PI+, Q2: Annexin V+/PI+, Q3: Annexin V+/PI-, Q4: Annexin V-/PI-). ( $n = 5$ ,  $* p < 0.05$ ,  $n.s.$ : nonsignificant).

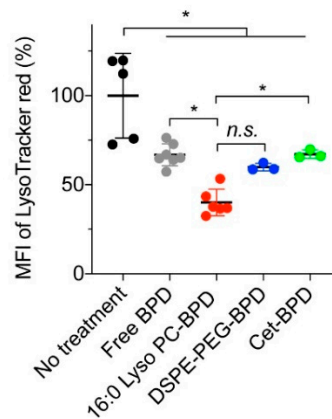

**Figure S6.** Analysis showing the mean fluorescent intensity (MFI) of LysoTracker Red staining in U251 cells after PDT with different PSBMs or free BPD. ( $n > 3$ ,  $n.s.$ : nonsignificant, one-way ANOVA with Tukey's post hoc test).
